# Supplementary material for: Molybdenum carbide and oxycarbide from carbon-supported MoO3 nanosheets: phase evolution and DRM catalytic activity assessed by TEM and in situ XANES/XRD methods
Source: Royal Society of Chemistry journal article supplement (doi:10.1039/d0nr02908d), 2020-01-01
Supplement: d0nr02908d1.pdf [file d0nr02908d1.pdf]

## Supporting Information

### **Molybdenum Carbide and Oxycarbide from Carbon-Supported MoO<sub>3</sub> Nanosheets: Phase Evolution and DRM Catalytic Activity Assessed by TEM and *in situ* XANES/XRD Methods**

Alexey Kurlov,<sup>†</sup> Xing Huang,<sup>\*,‡</sup> Evgeniya B. Deeva,<sup>†</sup> Paula M. Abdala,<sup>†</sup> Alexey Fedorov,<sup>\*,†</sup> Christoph R. Müller<sup>\*,†</sup>

<sup>†</sup>ETH Zürich, Department of Mechanical and Process Engineering, Leonhardstrasse 21, CH 8092 Zürich, Switzerland

<sup>‡</sup>ETH Zürich, ScopeM, Otto-Stern-Weg 3, CH 8093, Zürich, Switzerland

E-mail:

\* xing.huang@scopem.ethz.ch

\* fedoroal@ethz.ch

\* muelchri@ethz.ch

## List of Figures

|                                                                                                                                                                                                                                                                                                                                                                                                                                                                    |    |
|--------------------------------------------------------------------------------------------------------------------------------------------------------------------------------------------------------------------------------------------------------------------------------------------------------------------------------------------------------------------------------------------------------------------------------------------------------------------|----|
| <b>Figure S1.</b> SEM images of $\alpha$ -MoO <sub>3</sub> nanobelts.....                                                                                                                                                                                                                                                                                                                                                                                          | 3  |
| <b>Figure S2.</b> XRD (laboratory based) patterns of <i>h</i> -MoO <sub>3</sub> , $\alpha$ -MoO <sub>3</sub> and <i>d</i> -MoO <sub>3</sub> . ....                                                                                                                                                                                                                                                                                                                 | 4  |
| <b>Figure S3.</b> SEM images of <i>h</i> -MoO <sub>3</sub> .....                                                                                                                                                                                                                                                                                                                                                                                                   | 4  |
| <b>Figure S4.</b> TEM images of exfoliated <i>d</i> -MoO <sub>3</sub> .....                                                                                                                                                                                                                                                                                                                                                                                        | 5  |
| <b>Figure S5.</b> SEM images of carbon spheres.....                                                                                                                                                                                                                                                                                                                                                                                                                | 6  |
| <b>Figure S6.</b> TGA weight loss curve of the <i>d</i> -MoO <sub>3</sub> colloidal solution. ....                                                                                                                                                                                                                                                                                                                                                                 | 6  |
| <b>Figure S7.</b> HAADF-STEM (top) and HR-STEM (bottom) images of <i>d</i> -MoO <sub>3</sub> /C.....                                                                                                                                                                                                                                                                                                                                                               | 7  |
| <b>Figure S8.</b> STEM/EDX mapping of <i>d</i> -MoO <sub>3</sub> /C.....                                                                                                                                                                                                                                                                                                                                                                                           | 8  |
| <b>Figure S9.</b> EELS spectra of the Mo-rich phase of <i>d</i> -MoO <sub>3</sub> /C.....                                                                                                                                                                                                                                                                                                                                                                          | 9  |
| <b>Figure S10.</b> O K-edge spectrum of <i>d</i> -MoO <sub>3</sub> /C.....                                                                                                                                                                                                                                                                                                                                                                                         | 9  |
| <b>Figure S11.</b> Comparison of EELS Mo M <sub>2,3</sub> edge and O K-edge of <i>d</i> -MoO <sub>3</sub> /C, Mo <sub>2</sub> C/C and Mo <sub>2</sub> C/C <sub>TOS480</sub> .10                                                                                                                                                                                                                                                                                    | 10 |
| <b>Figure S12.</b> Cumulative variance plots obtained by principal component analysis (PCA) of the <i>in situ</i> XANES data during carburization and DRM. ....                                                                                                                                                                                                                                                                                                    | 10 |
| <b>Figure S13.</b> XANES spectra of the components obtained by MCR-ALS analysis during carburization (left) and DRM (right). ....                                                                                                                                                                                                                                                                                                                                  | 11 |
| <b>Figure S14.</b> Trends in the composition of the off gas during the <i>in situ</i> DRM experiments as determined by a mass spectrometer (MS). ....                                                                                                                                                                                                                                                                                                              | 12 |
| <b>Figure S15.</b> Comparison of the XANES spectra of the catalyst Mo <sub>2</sub> C/C after having been exposed for 2 h under DRM conditions and after a re-carburization attempt in CH <sub>4</sub> for 90 min. ....                                                                                                                                                                                                                                             | 13 |
| <b>Figure S16.</b> (S)TEM images of reacted Mo <sub>2</sub> C <sub>x</sub> O <sub>y</sub> /C with platelet (a) and nanorod (b) structures.....                                                                                                                                                                                                                                                                                                                     | 13 |
| <b>Figure S17.</b> TEM images of reacted Mo <sub>2</sub> C <sub>x</sub> O <sub>y</sub> /C indicating a surface layer with low crystallinity.....                                                                                                                                                                                                                                                                                                                   | 14 |
| <b>Figure S18.</b> STEM/EDX mapping of reacted Mo <sub>2</sub> C <sub>x</sub> O <sub>y</sub> /C indicating differences in the oxygen content in the various morphologies. ....                                                                                                                                                                                                                                                                                     | 15 |
| <b>Figure S19.</b> STEM/EDX mapping and EDX line profile of Mo <sub>2</sub> C <sub>x</sub> O <sub>y</sub> /C indicating an O-rich surface layer. 15                                                                                                                                                                                                                                                                                                                | 15 |
| <b>Figure S20.</b> a) HRTEM image of the Mo <sub>2</sub> C <sub>x</sub> O <sub>y</sub> nanorod in the spent catalyst and b) corresponding FFT; c), d) simulated electron diffraction along the most possible zone axis by referencing the standard Mo <sub>2</sub> C and MoO <sub>2</sub> ; e) standard values calculated from the two reference structures; the errors are generated due to the misfit between our experimental data and the standard values..... | 16 |

## List of Tables

|                                                                                                                                                       |    |
|-------------------------------------------------------------------------------------------------------------------------------------------------------|----|
| <b>Table S1.</b> Quality indicators of the MCR-ALS analysis of <i>in situ</i> XANES data obtained during the carburization and the DRM reaction. .... | 11 |
|-------------------------------------------------------------------------------------------------------------------------------------------------------|----|

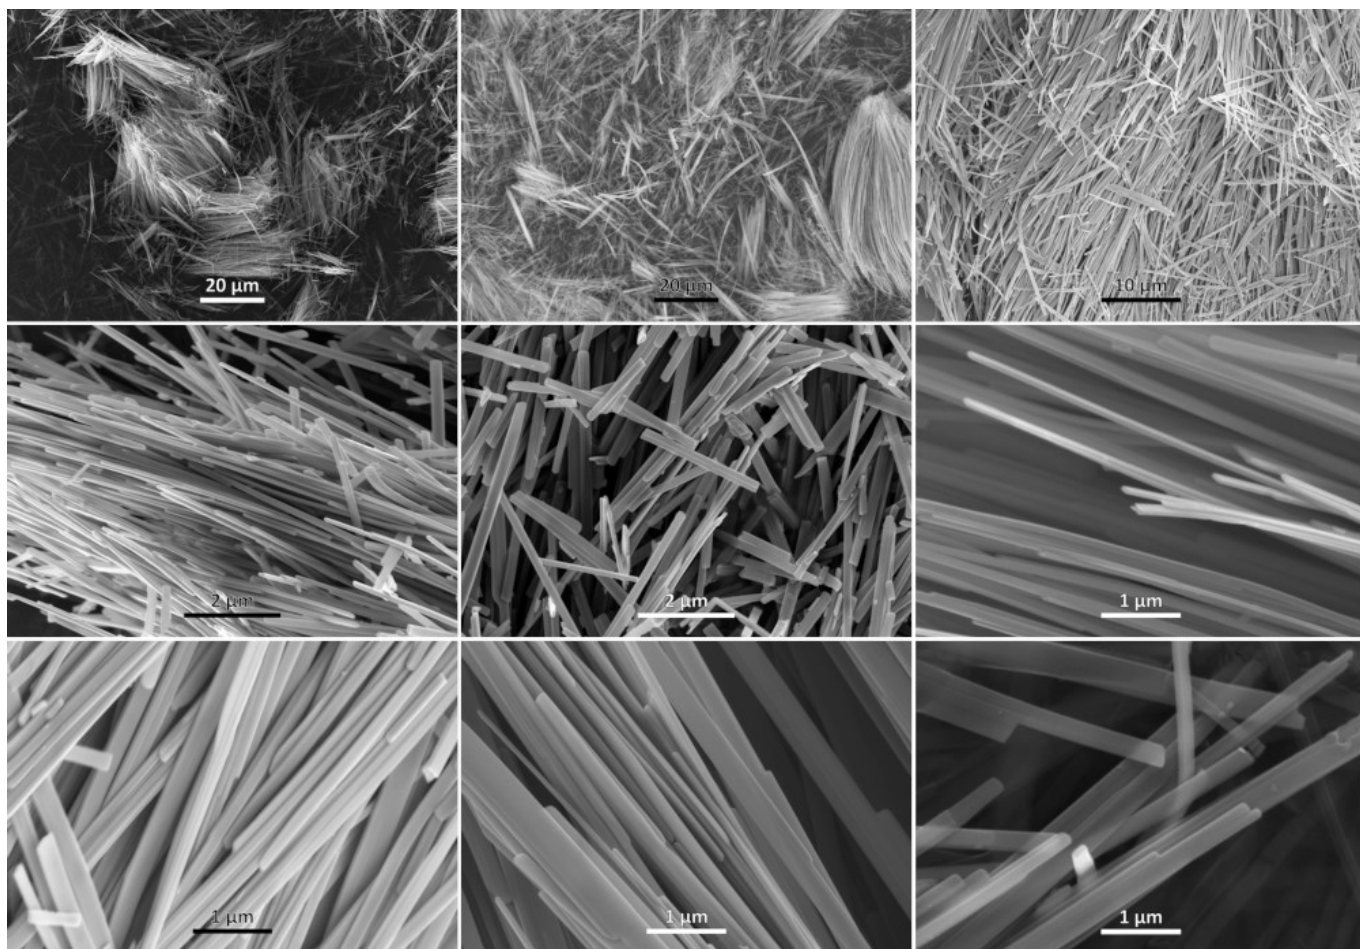

**Figure S1.** SEM images of  $\alpha$ -MoO<sub>3</sub> nanobelts.

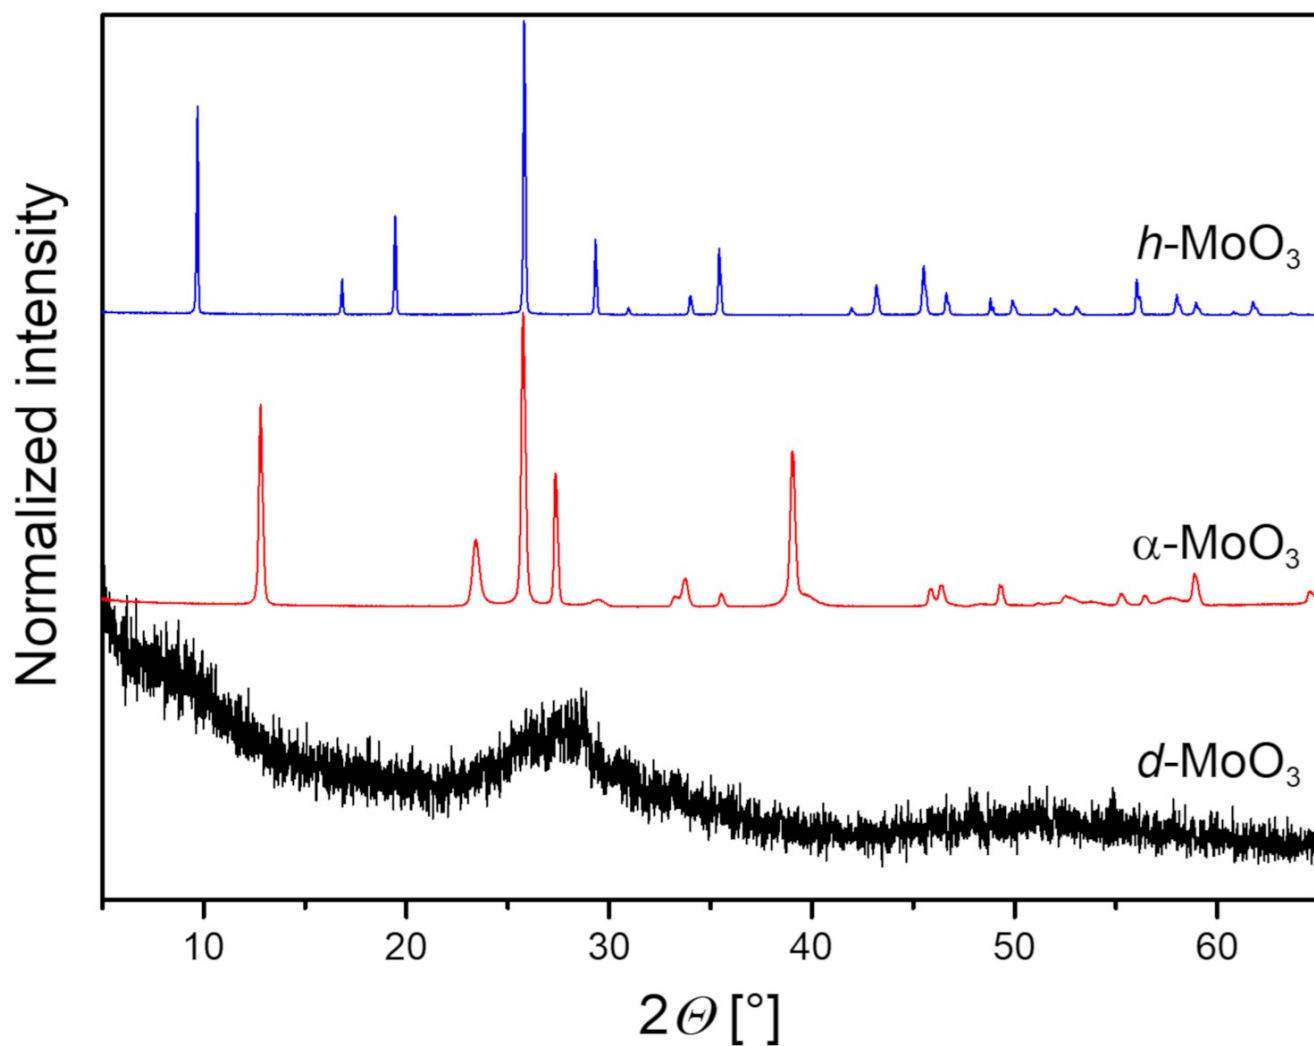

Figure S2. XRD (laboratory based) patterns of  $h\text{-MoO}_3$ ,  $\alpha\text{-MoO}_3$  and  $d\text{-MoO}_3$ .

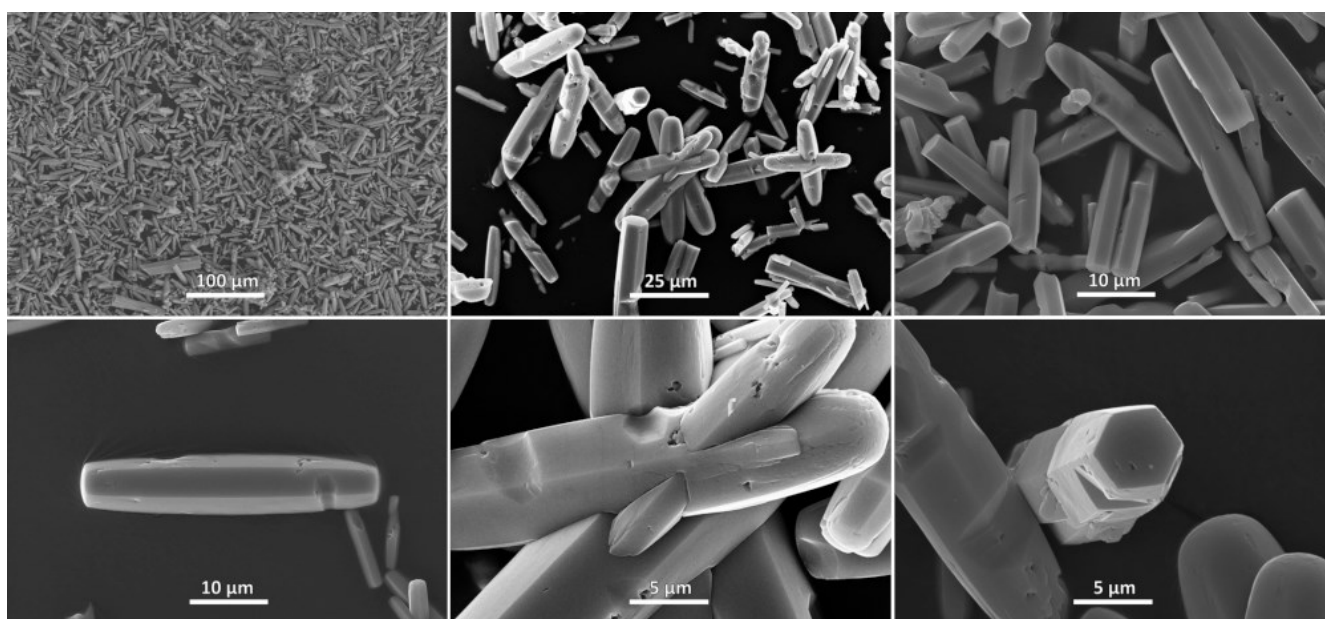

Figure S3. SEM images of  $h\text{-MoO}_3$ .

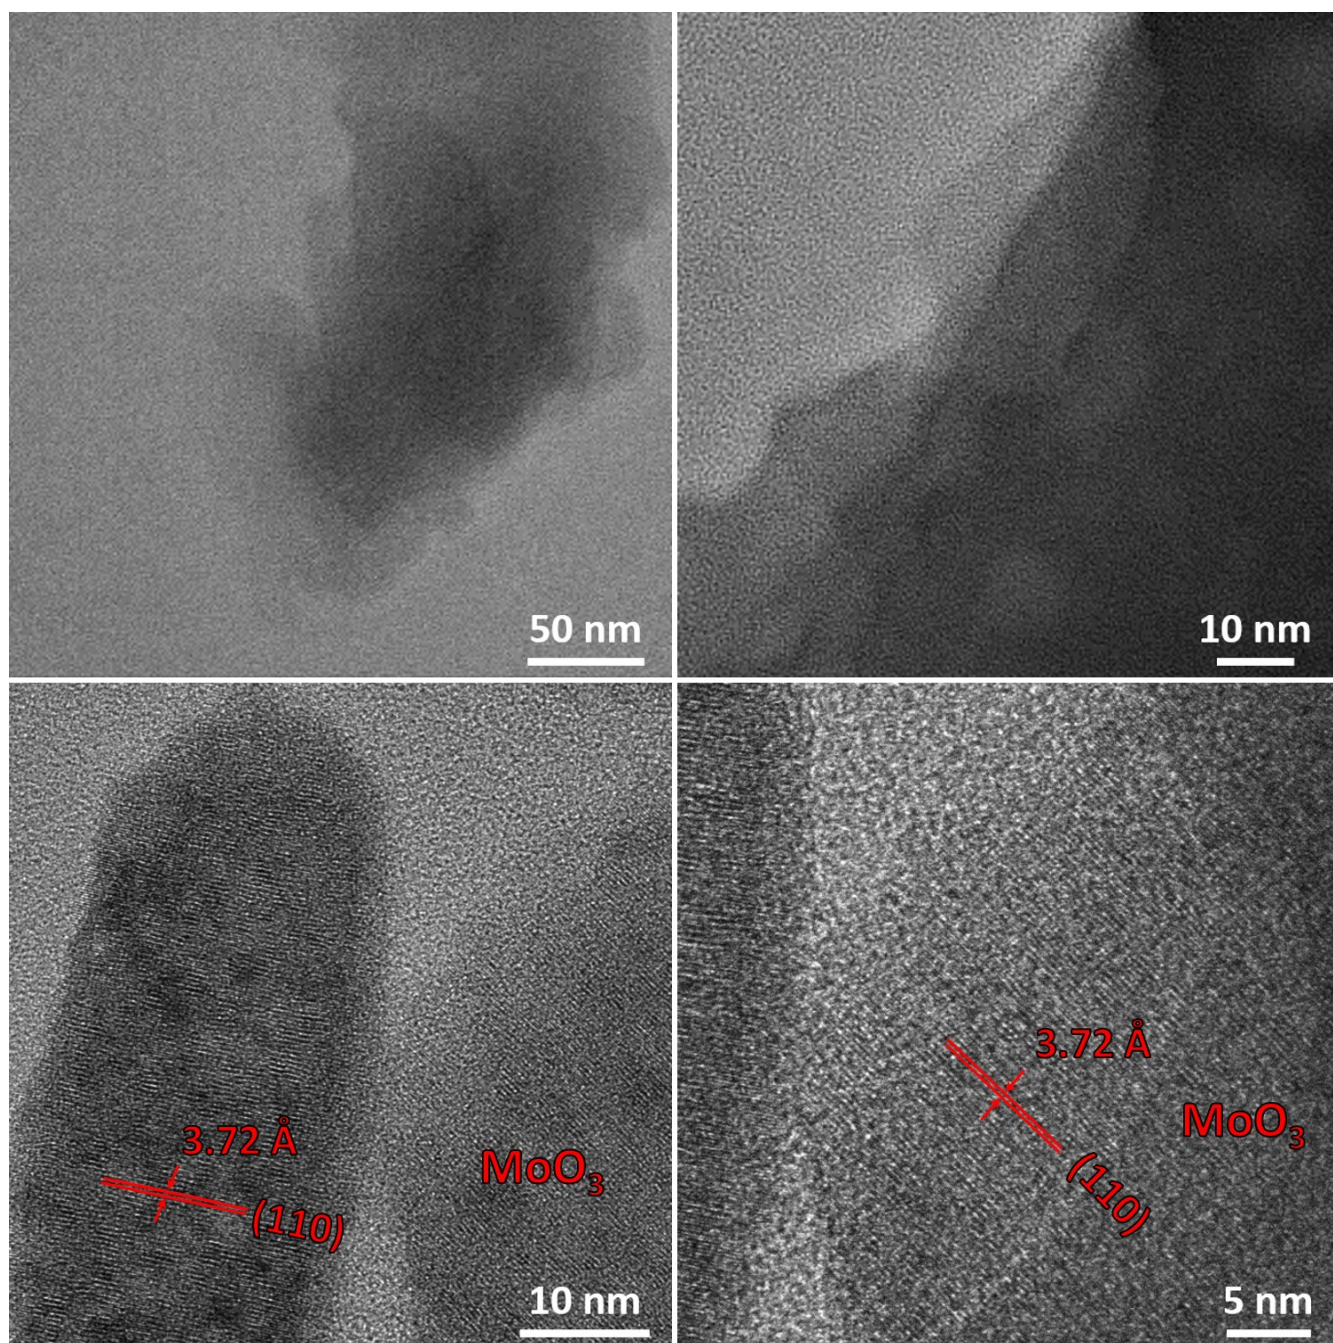

**Figure S4.** TEM images of exfoliated  $d\text{-MoO}_3$ .

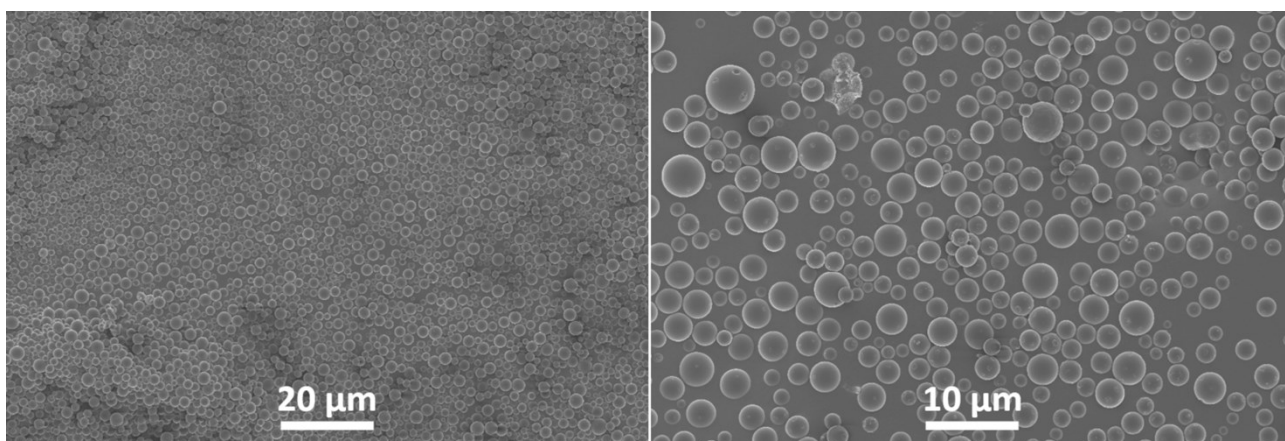

Figure S5. SEM images of carbon spheres.

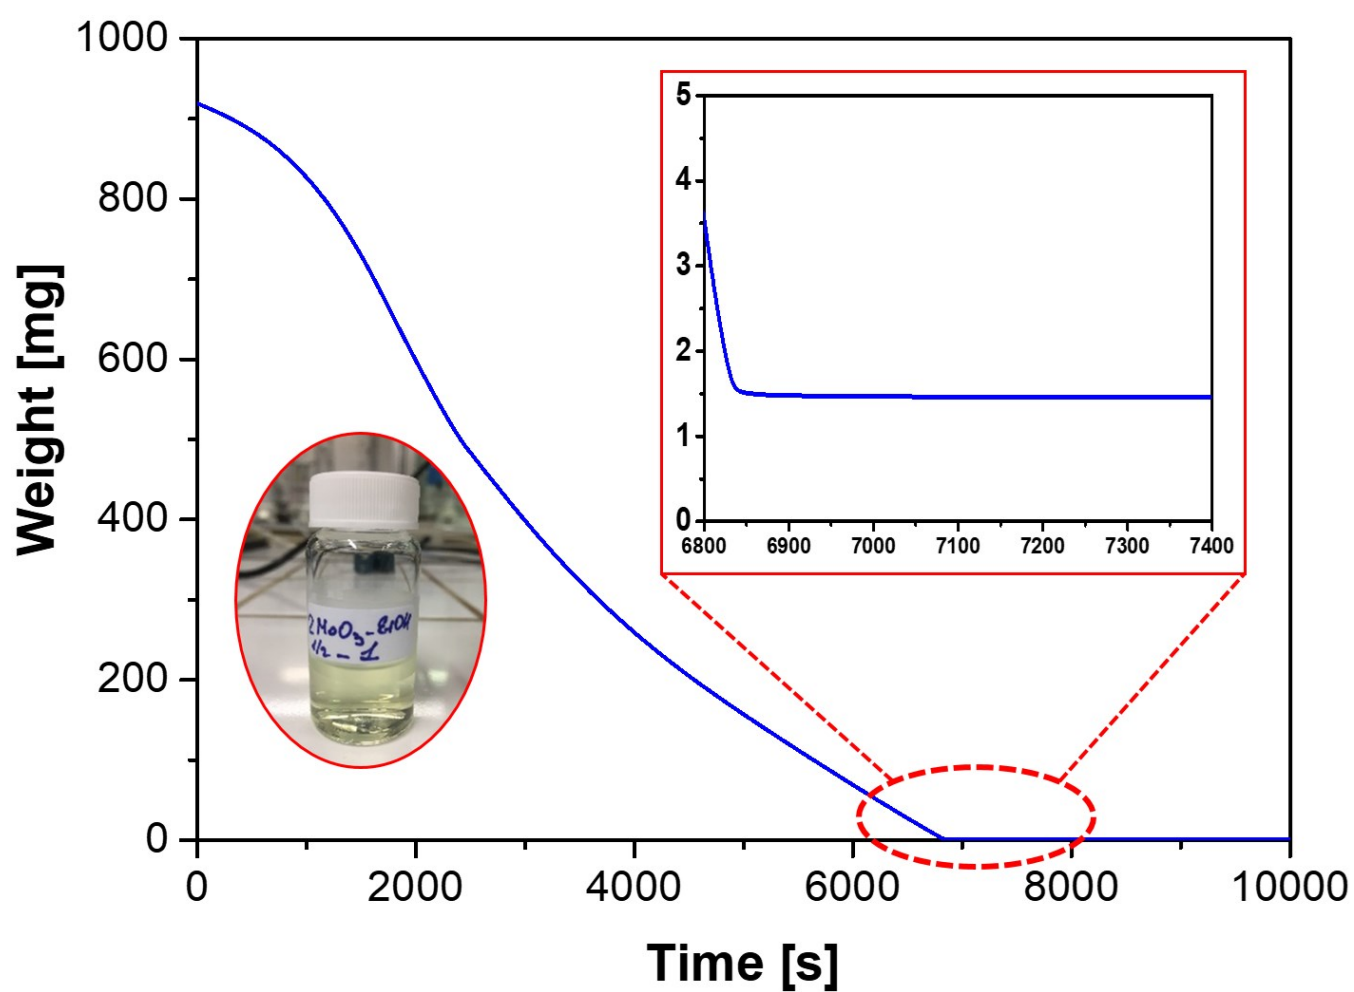

Figure S6. TGA weight loss curve of the *d*-MoO<sub>3</sub> colloidal solution.

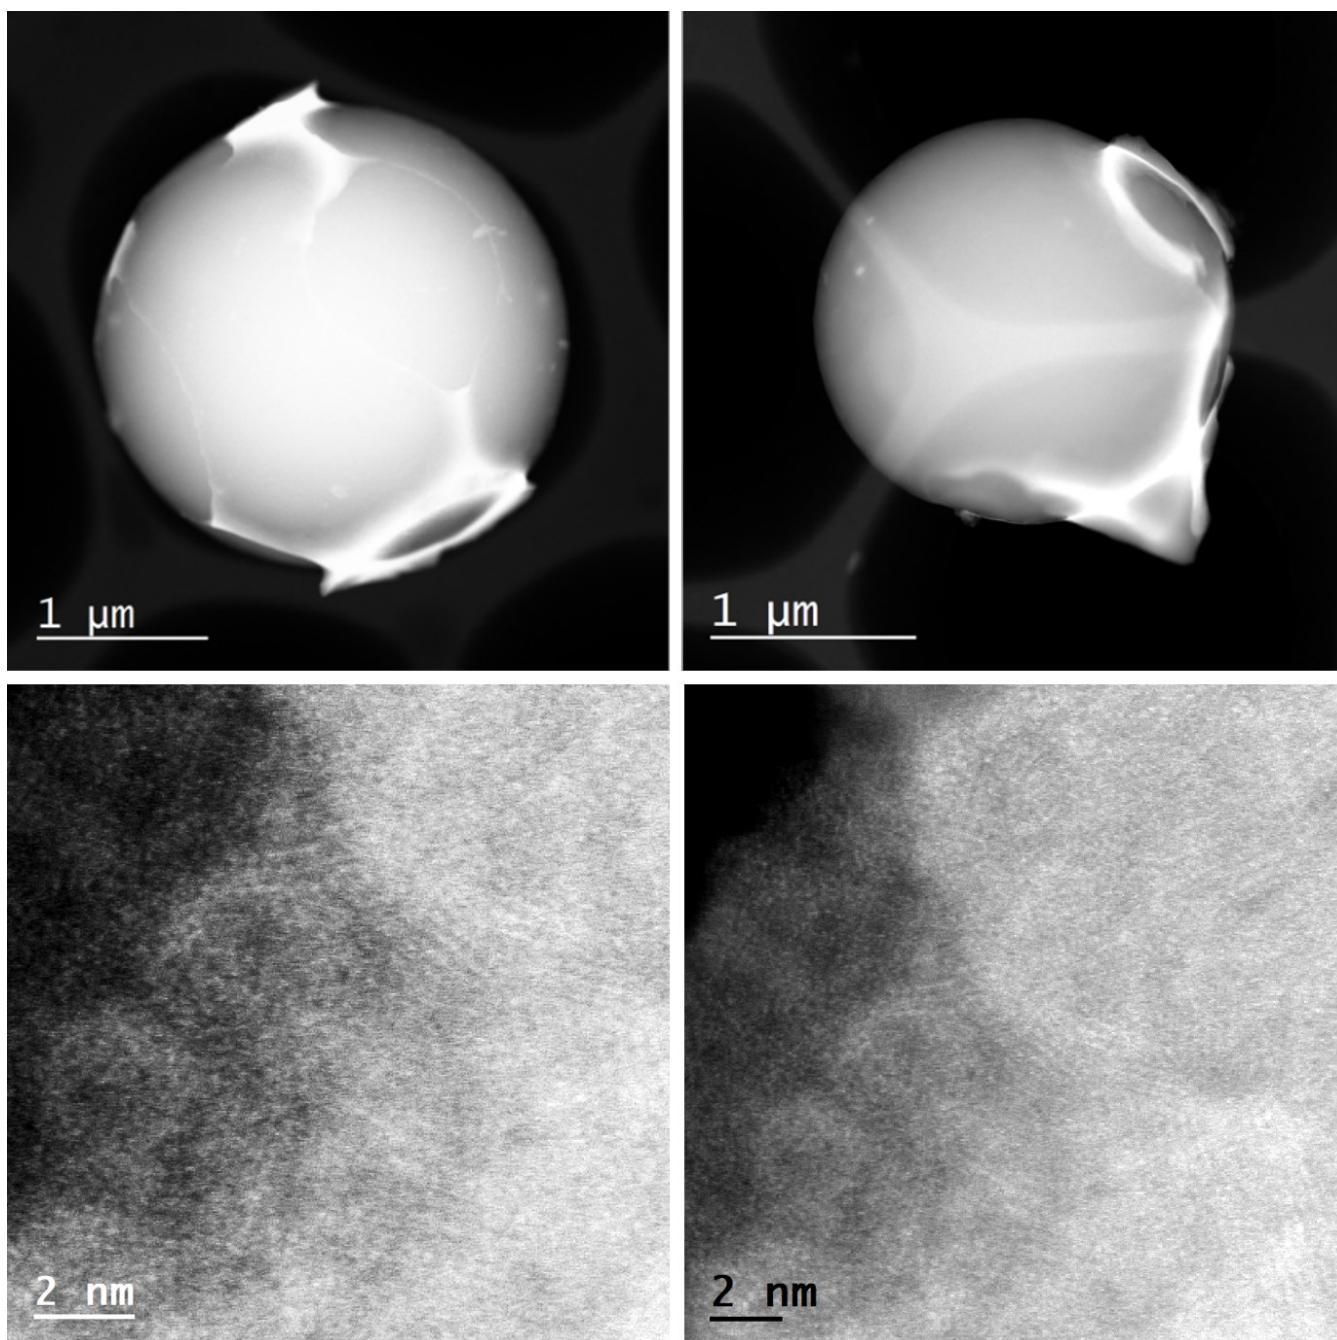

**Figure S7.** HAADF-STEM (top) and HR-STEM (bottom) images of *d*-MoO<sub>3</sub>/C.

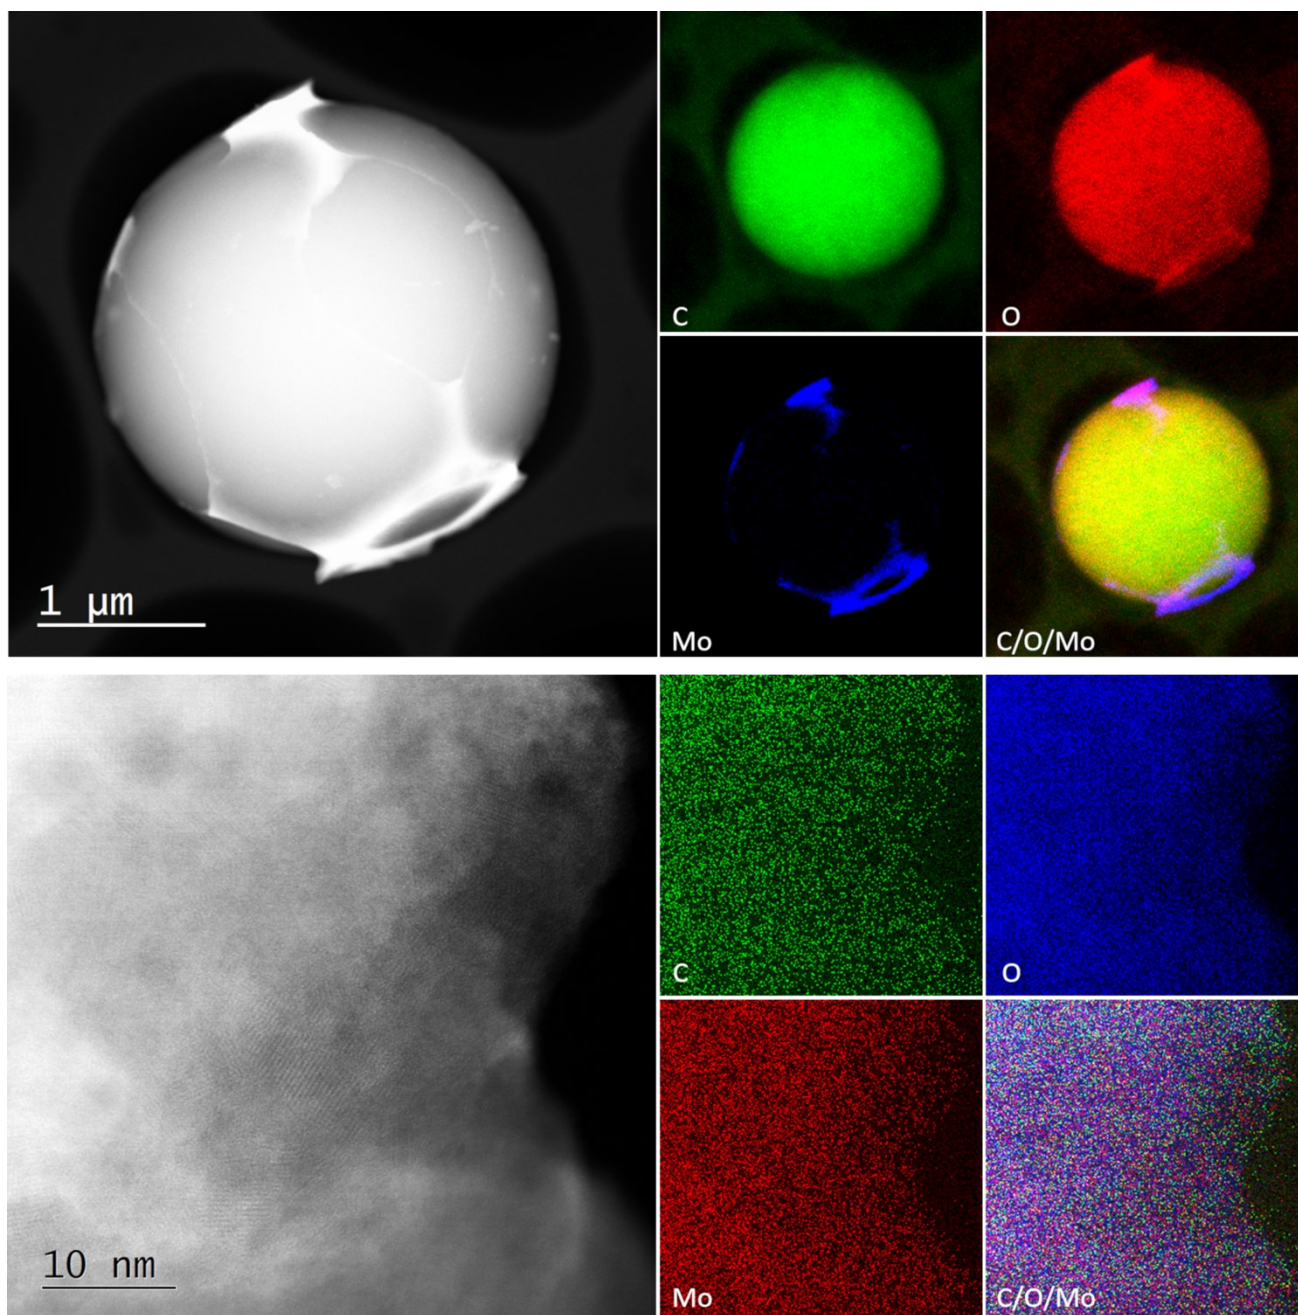

**Figure S8.** STEM/EDX mapping of *d*-MoO<sub>3</sub>/C.



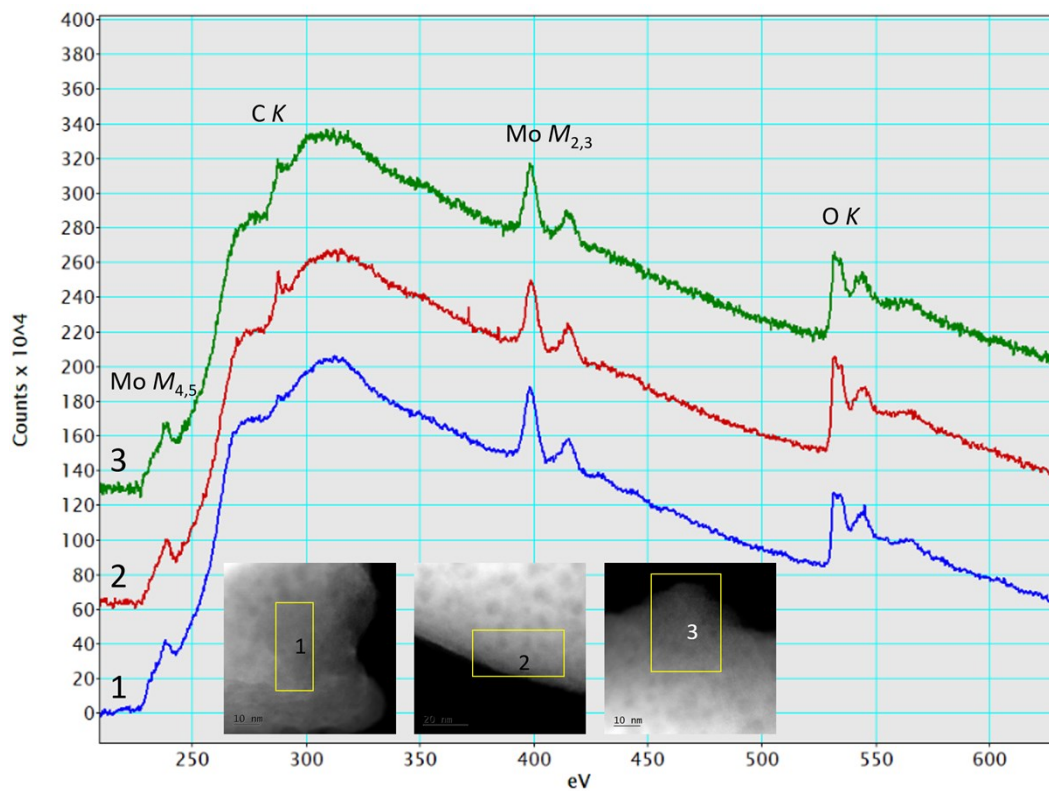

**Figure S9.** EELS spectra of the Mo-rich phase of *d*-MoO<sub>3</sub>/C.

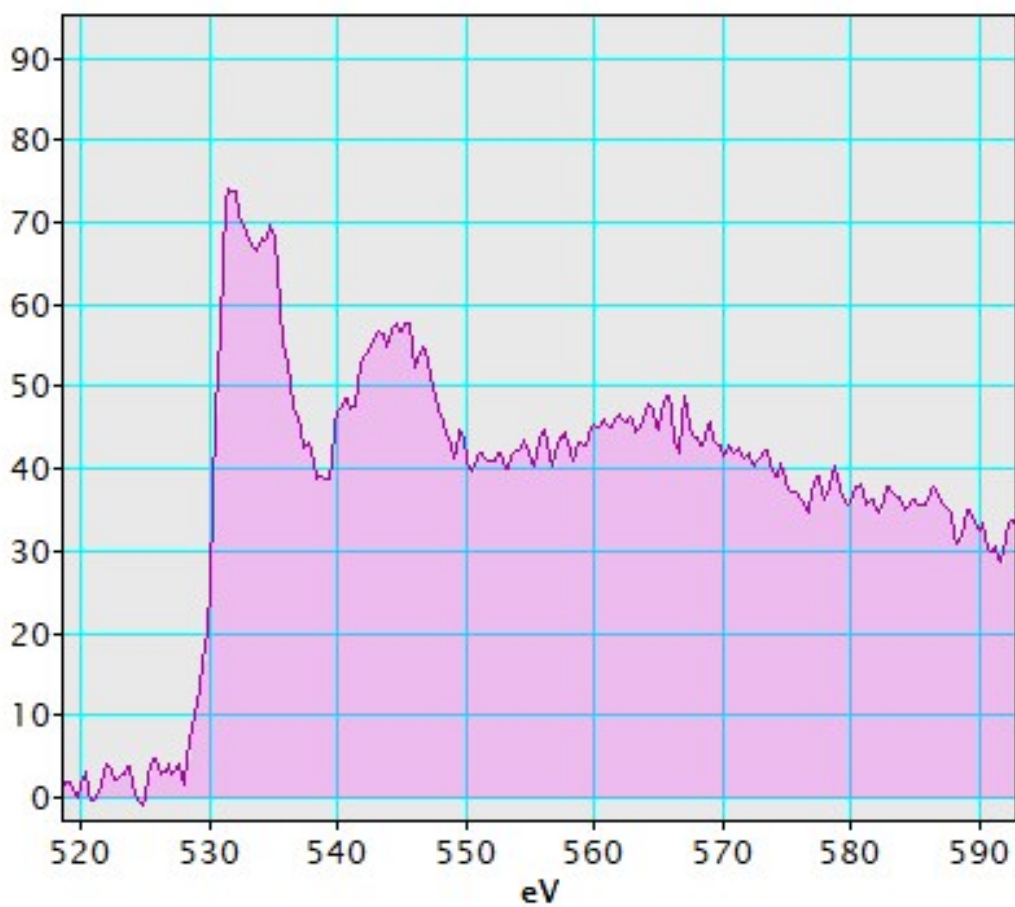

**Figure S10.** O K-edge spectrum of *d*-MoO<sub>3</sub>/C.

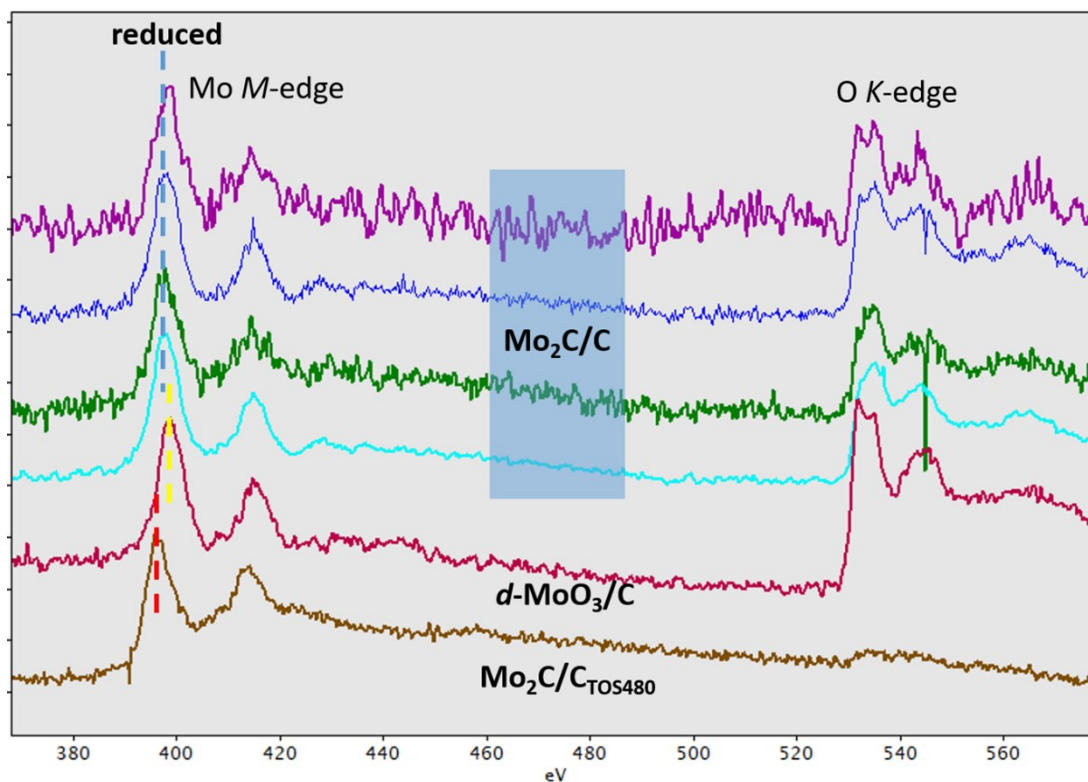

**Figure S11.** Comparison of EELS Mo  $M_{2,3}$  edge and O K-edge of  $d\text{-MoO}_3/\text{C}$ ,  $\text{Mo}_2\text{C}/\text{C}$  and  $\text{Mo}_2\text{C}/\text{C}_{\text{TOS480}}$ .

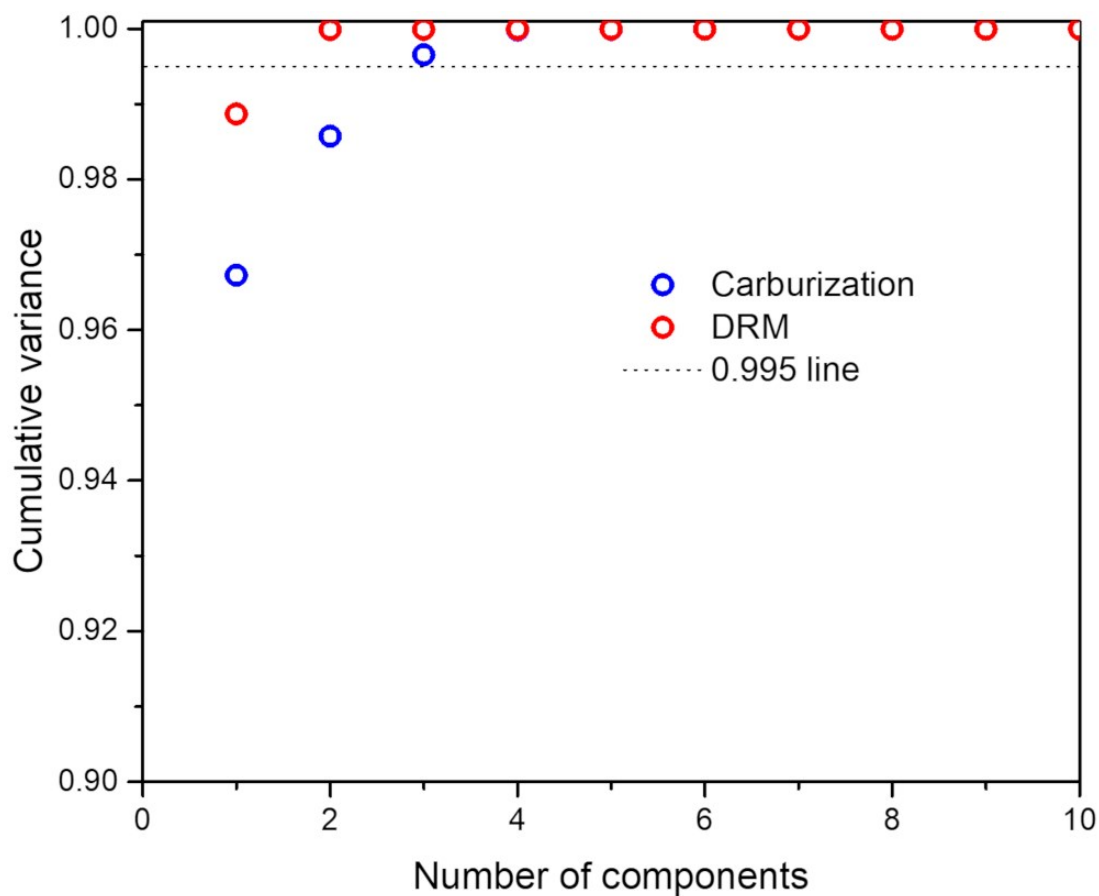

**Figure S12.** Cumulative variance plots obtained by principal component analysis (PCA) of the *in situ* XANES data during carburization and DRM.

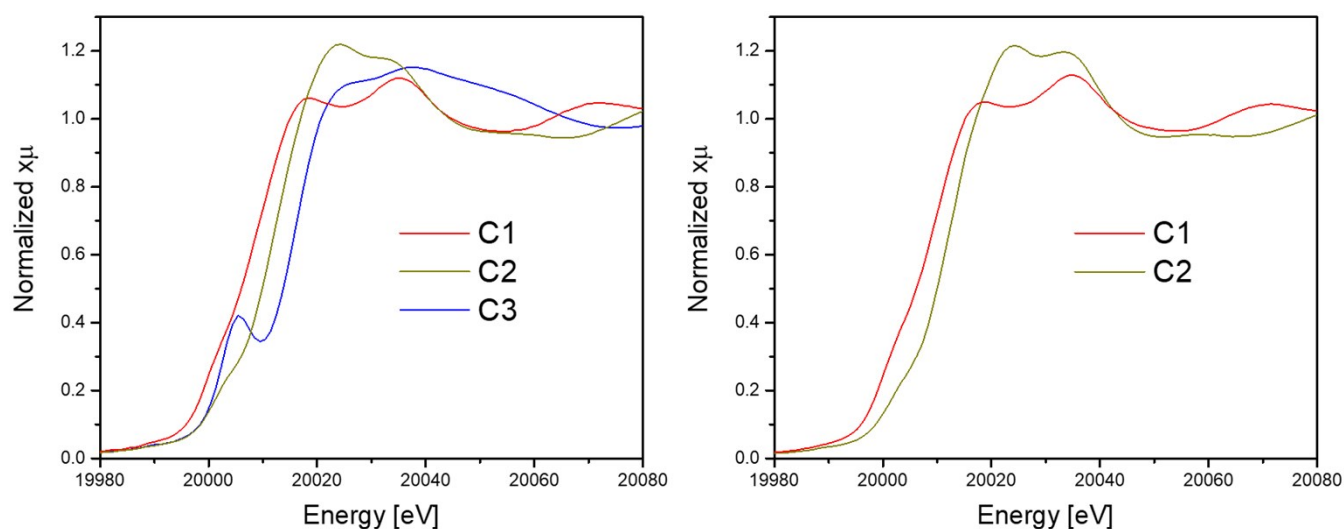

**Figure S13.** XANES spectra of the components obtained by MCR-ALS analysis during carburization (left) and DRM (right).

**Table S1.** Quality indicators of the MCR-ALS analysis of in situ XANES data obtained during the carburization and the DRM reaction.

| <b>Carburization</b>                            |                          |
|-------------------------------------------------|--------------------------|
| Fitting error (lack of fit, LOF) in % (PCA)     | $1.4486 \times 10^{-13}$ |
| Fitting error (lack of fit, LOF) in % (exp.)    | 0.45665                  |
| Percentage of variance explained at the optimum | 99.9979                  |
| <b>DRM</b>                                      |                          |
| Fitting error (lack of fit, LOF) in % (PCA)     | $1.9635 \times 10^{-14}$ |
| Fitting error (lack of fit, LOF) in % (exp.)    | 0.35492                  |
| Percentage of variance explained at the optimum | 99.9987                  |

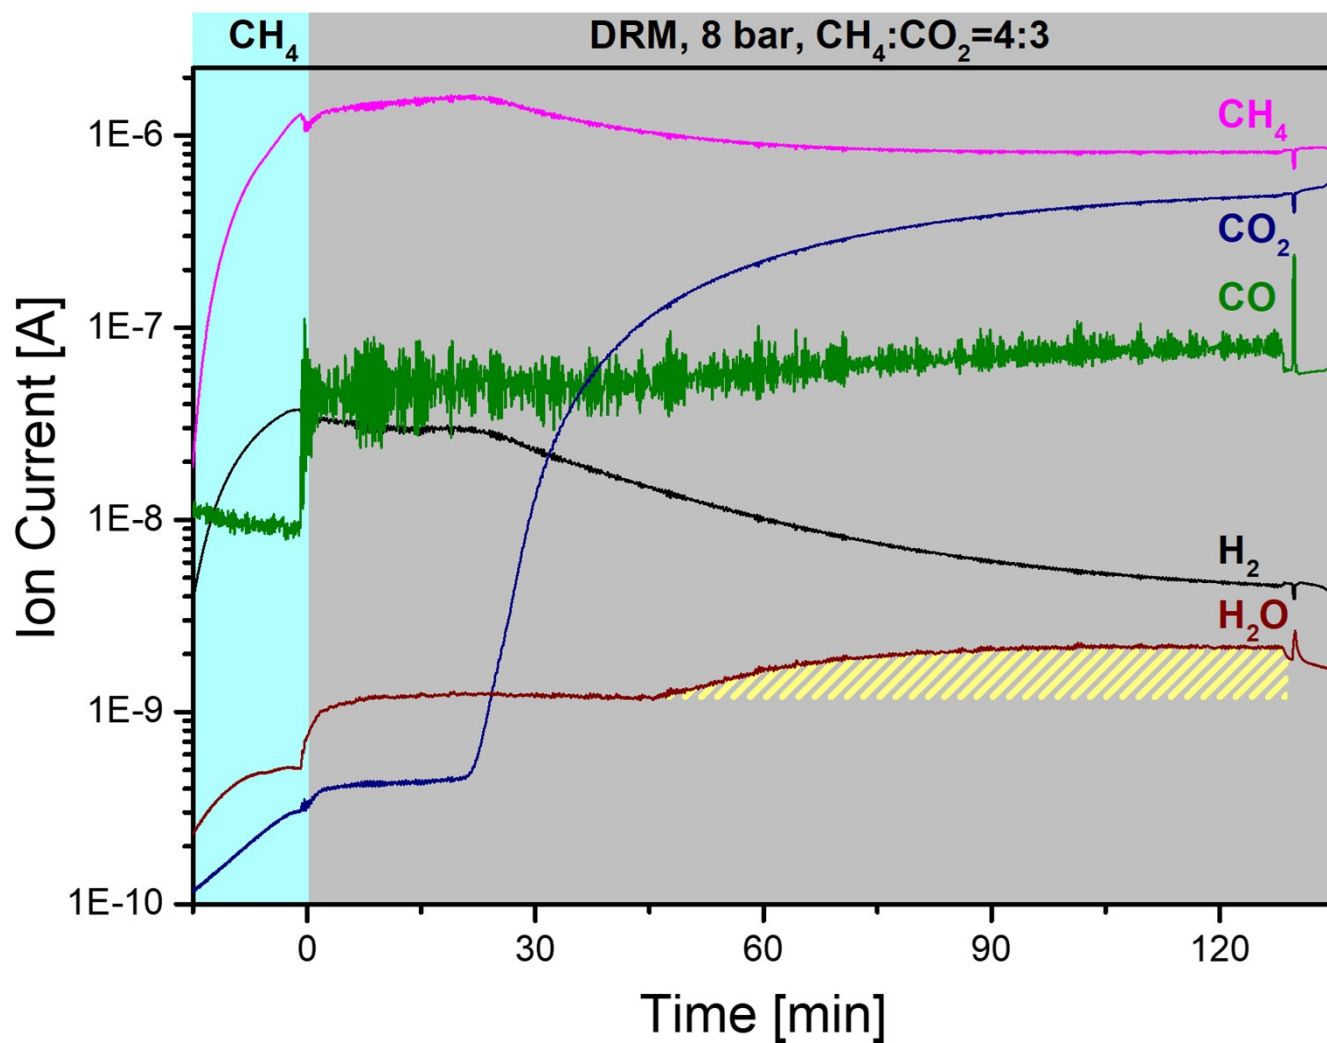

**Figure S14.** Trends in the composition of the off gas during the *in situ* DRM experiments as determined by a mass spectrometer (MS).

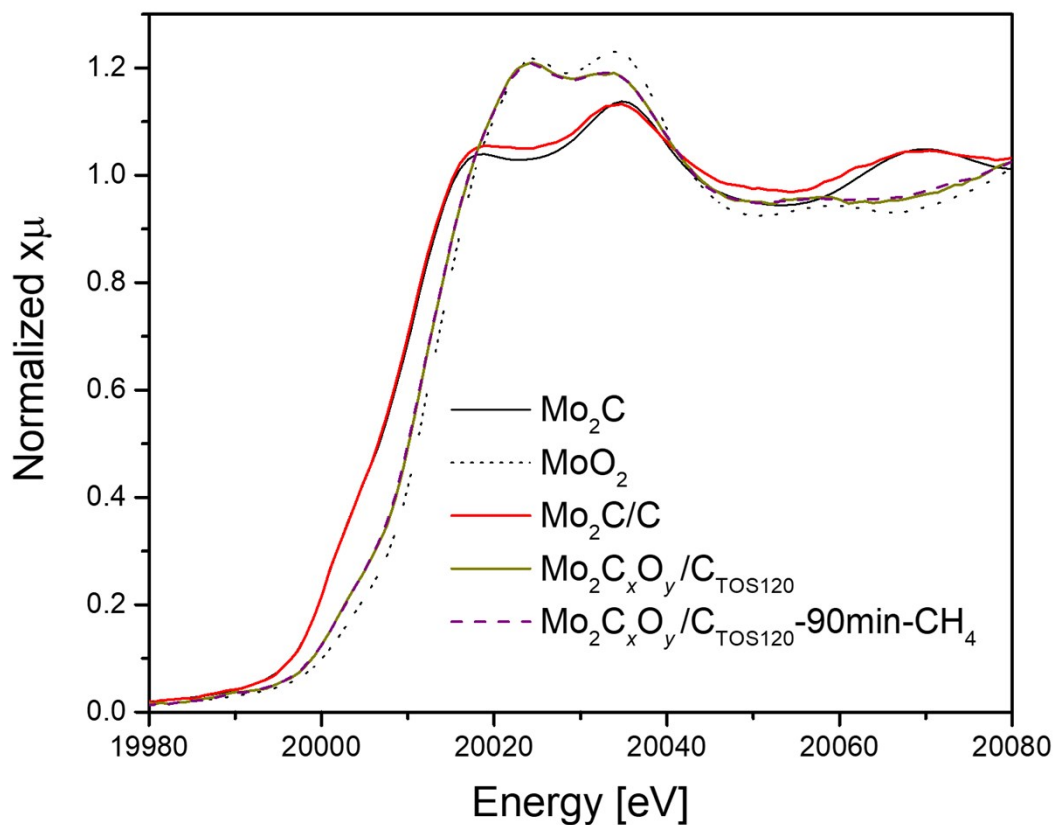

**Figure S15.** Comparison of the XANES spectra of the catalyst Mo<sub>2</sub>C/C after having been exposed for 2 h under DRM conditions and after a re-carburization attempt in CH<sub>4</sub> for 90 min.

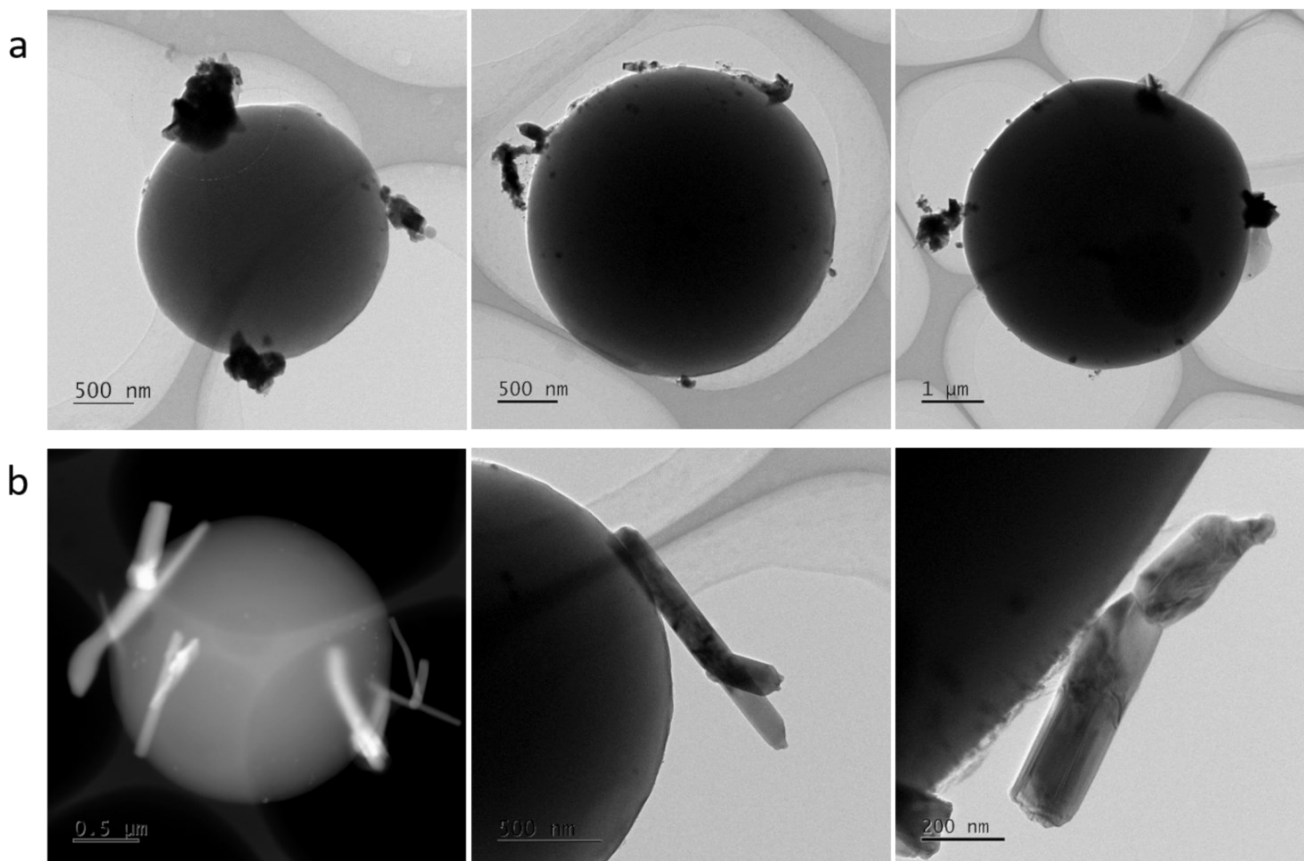

**Figure S16.** (S)TEM images of reacted Mo<sub>2</sub>C<sub>x</sub>O<sub>y</sub>/C with platelet (a) and nanorod (b) structures.

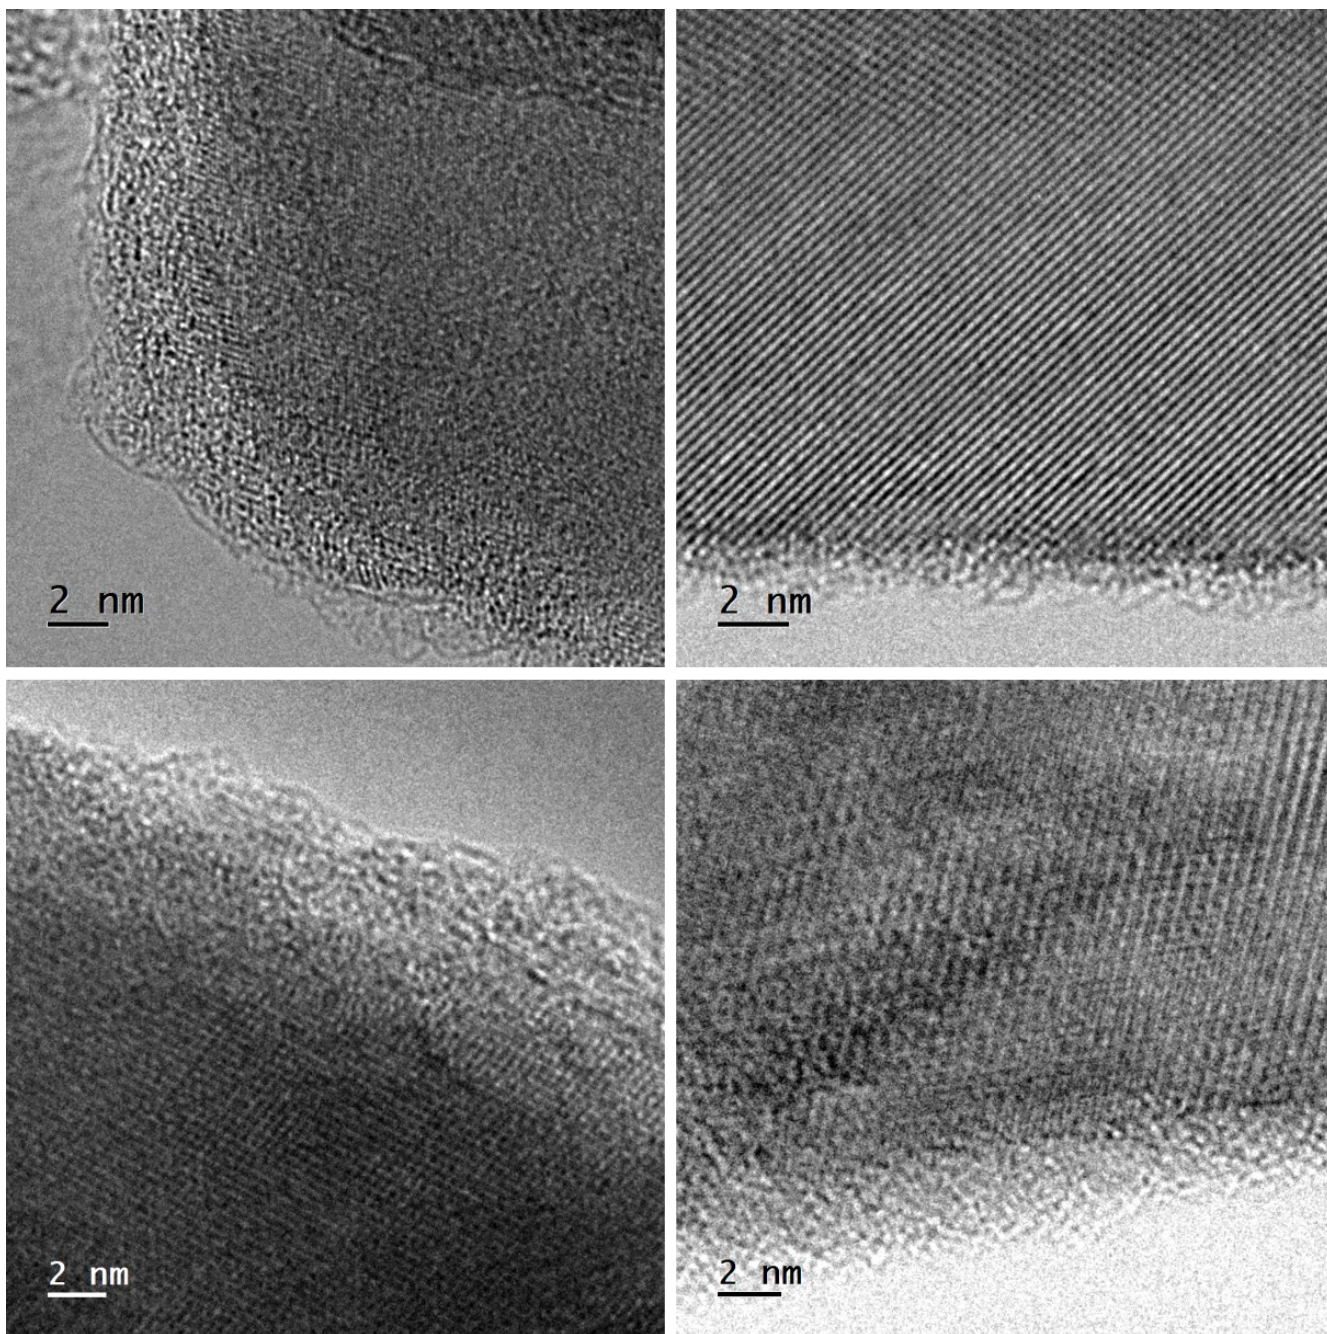

**Figure S17.** TEM images of reacted  $\text{Mo}_2\text{C}_x\text{O}_y/\text{C}$  indicating a surface layer with low crystallinity.

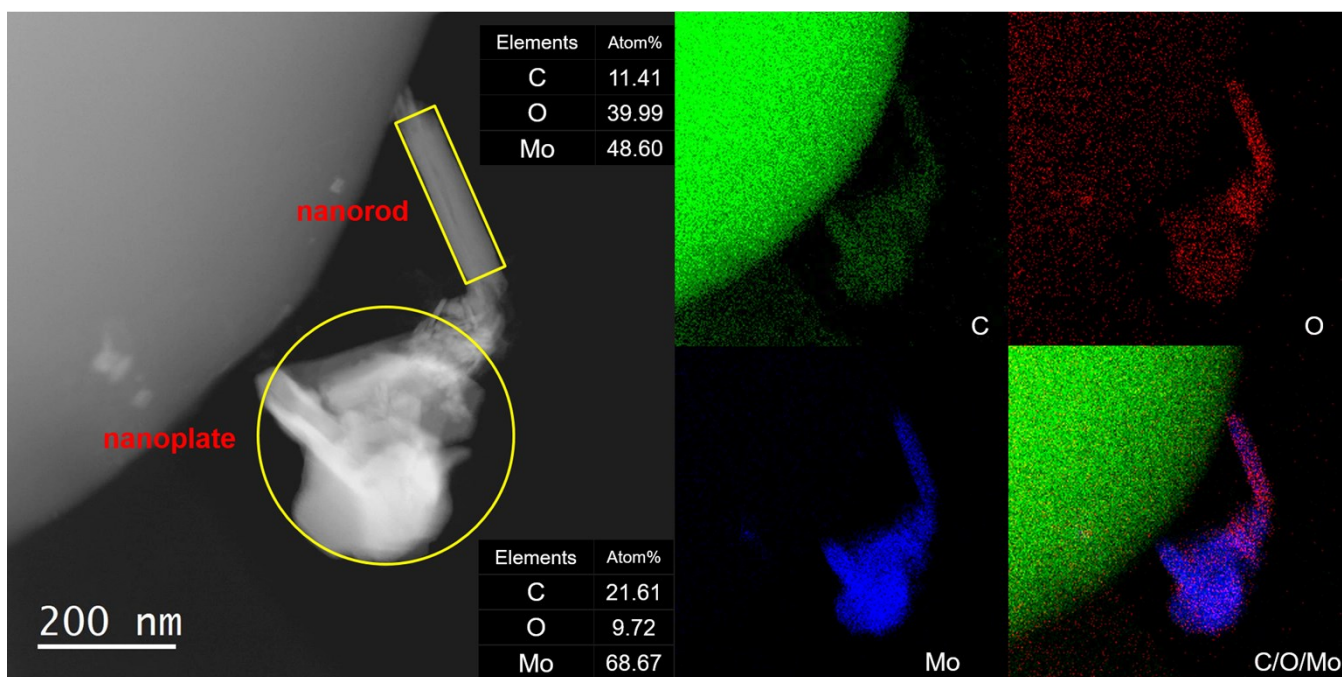

**Figure S18.** STEM/EDX mapping of reacted  $\text{Mo}_2\text{C}_x\text{O}_y/\text{C}$  indicating differences in the oxygen content in the various morphologies.

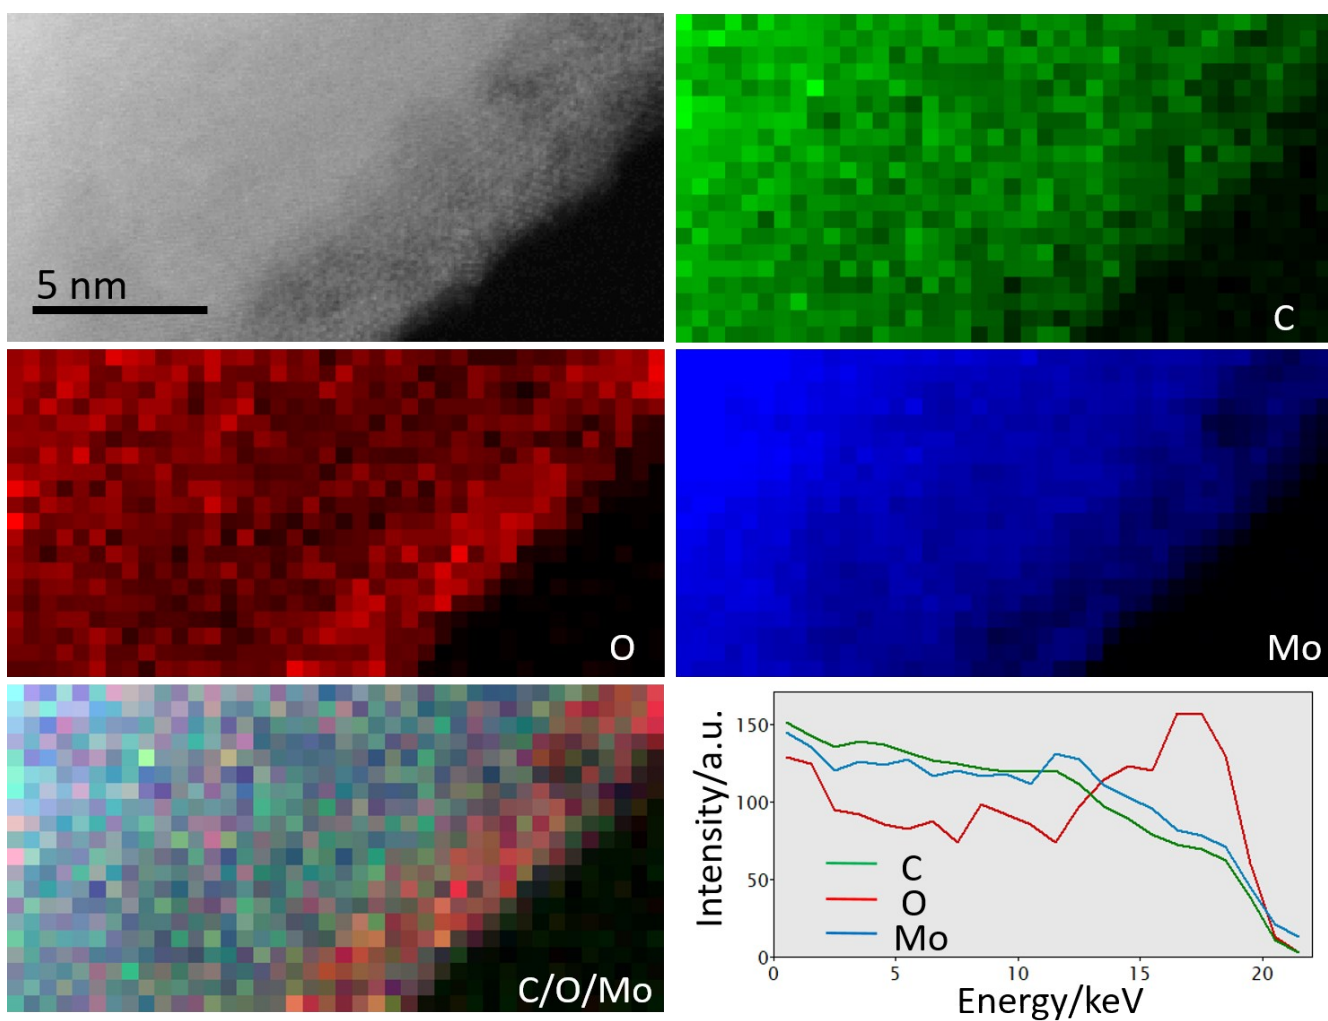

**Figure S19.** STEM/EDX mapping and EDX line profile of  $\text{Mo}_2\text{C}_x\text{O}_y/\text{C}$  indicating an O-rich surface layer.

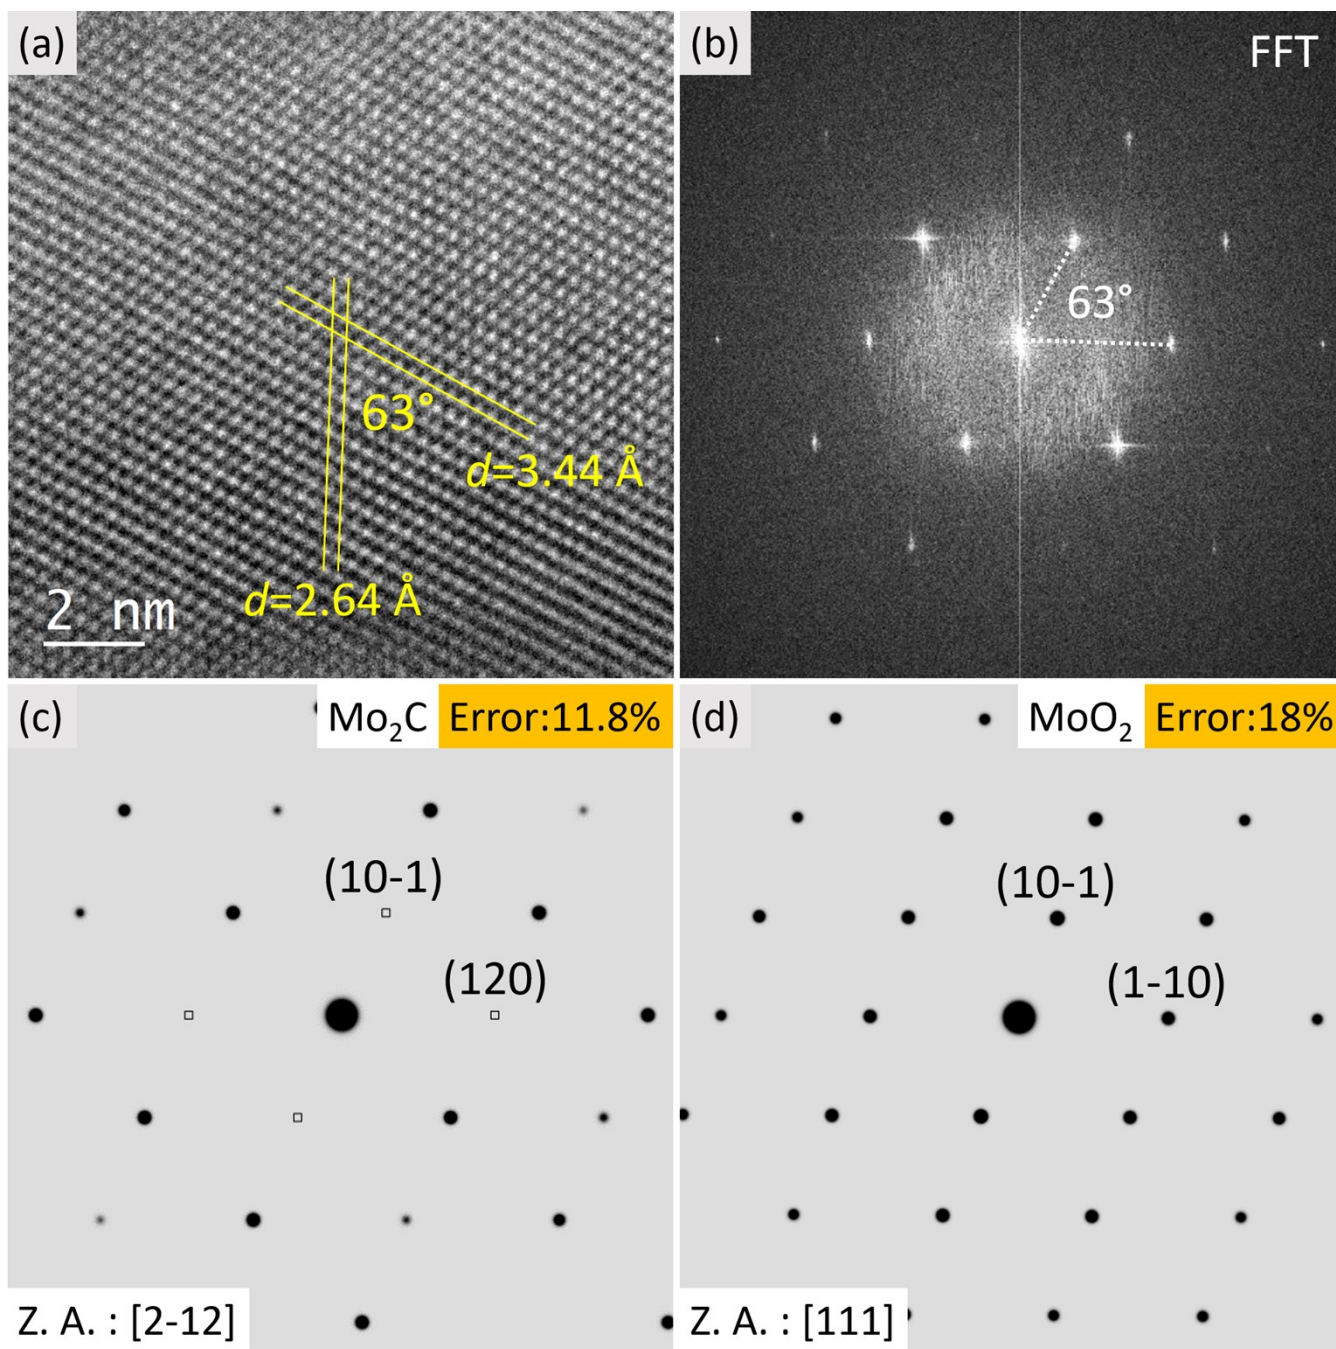

(e)

|                   | (hkl)1 | (hkl)2 | d-hkl1 | d-hkl2 | Angle  | Zone axis | Error  |
|-------------------|--------|--------|--------|--------|--------|-----------|--------|
| Mo <sub>2</sub> C | 10-1   | 120    | 3.51   | 2.54   | 66.74° | 2-12      | 11.8 % |
| MoO <sub>2</sub>  | 10-1   | 1-10   | 3.43   | 2.43   | 69.21° | 111       | 18 %   |

**Figure S20.** a) HRTEM image of the Mo<sub>2</sub>C<sub>x</sub>O<sub>y</sub> nanorod in the spent catalyst and b) corresponding FFT; c), d) simulated electron diffraction along the most possible zone axis by referencing the standard Mo<sub>2</sub>C and MoO<sub>2</sub>; e) standard values calculated from the two reference structures; the errors are generated due to the misfit between our experimental data and the standard values.
